# Supplementary material for: Highly efficient near-infrared phosphor LaMgGa11O19:Cr3+
Source: Royal Society of Chemistry journal article supplement (doi:10.1039/d0qi00063a), 2020-01-01
Supplement: d0qi00063a1.pdf [file d0qi00063a1.pdf]

## Supporting information

### Highly efficient near-infrared phosphor LaMgGa<sub>11</sub>O<sub>19</sub>:Cr<sup>3+</sup>

Shenqiang Liu, Zhizhen Wang, Hao Cai, Zhen Song, Quanlin Liu\*

The Beijing Municipal Key Laboratory of New Energy Materials and Technologies, School of Materials Sciences and Engineering, University of Science and Technology Beijing, Beijing 100083, China. E-mail: [qlliu@ustb.edu.cn](mailto:qlliu@ustb.edu.cn)

**Table S1.** The refined structural parameters of LaMgGa<sub>11</sub>O<sub>19</sub> with *P*6<sub>3</sub>/*mmc* space group.

| Atom                   | x         | y         | z        | Occ.  | Site |                        |                                               |
|------------------------|-----------|-----------|----------|-------|------|------------------------|-----------------------------------------------|
| 1 Ga Ga <sup>I</sup>   | 0.000(0)  | 0.000(0)  | 0.000(0) | 0.750 | 2a   | space group            | <i>P</i> 6 <sub>3</sub> / <i>mmc</i><br>(194) |
| Mg                     |           |           |          |       |      |                        |                                               |
| 2 Mg <sup>I</sup>      | 0.000(0)  | 0.000(0)  | 0.000(0) | 0.250 | 2a   | symmetry               | hexagonal                                     |
| 3 Ga Ga <sup>II</sup>  | 0.000(0)  | 0.000(0)  | 0.241(4) | 0.499 | 4e   |                        |                                               |
| 4 Ga Ga <sup>III</sup> | 0.333(3)  | 0.666(7)  | 0.027(3) | 0.625 | 4f   |                        |                                               |
| Mg                     |           |           |          |       |      |                        |                                               |
| 5 Mg <sup>III</sup>    | 0.333(3)  | 0.666(7)  | 0.027(3) | 0.375 | 4f   | Lattice                | a=5.80559<br>c=22.71567                       |
| 6 Ga Ga <sup>IV</sup>  | 0.333(3)  | 0.666(7)  | 0.188(9) | 1.000 | 4f   |                        |                                               |
| 7 Ga Ga <sup>V</sup>   | -0.164(4) | 0.164(4)  | 0.109(7) | 1.000 | 12k  | parameters (Å)         |                                               |
| 8 O O <sup>I</sup>     | 0.000(0)  | 0.000(0)  | 0.149(9) | 1.000 | 4e   | <i>R<sub>p</sub></i>   | 7.101                                         |
| 9 O O <sup>II</sup>    | 0.666(7)  | 0.333(3)  | 0.057(6) | 1.000 | 4f   |                        |                                               |
| 10 O O <sup>III</sup>  | 0.182(0)  | -0.182(0) | 0.250(0) | 1.000 | 6h   | <i>R<sub>w</sub></i>   | 9.413                                         |
| 11 O O <sup>IV</sup>   | 0.152(0)  | -0.152(0) | 0.053(0) | 1.000 | 12k  | <i>R<sub>exp</sub></i> | 4.219                                         |
| 12 O O <sup>V</sup>    | 0.505(0)  | -0.505(0) | 0.150(8) | 1.000 | 12k  |                        |                                               |
| 13 La La <sup>I</sup>  | 0.666(7)  | 0.333(3)  | 0.250(0) | 0.770 | 2d   |                        |                                               |
| 14 La La <sup>II</sup> | 0.732(3)  | 0.267(7)  | 0.250(0) | 0.076 | 6h   |                        |                                               |

**Table S2.** Ga-O bond length data derived from the refined result.

|                    | Bond length (Å) | Average (Å) |                     | Bond length (Å) | Average (Å) |                    | Bond length (Å) | Average (Å) |
|--------------------|-----------------|-------------|---------------------|-----------------|-------------|--------------------|-----------------|-------------|
| Ga <sup>I</sup> -O | 1.945(7)        | 1.946       | Ga <sup>IV</sup> -O | 2.035(5)        | 1.966       | Ga <sup>V</sup> -O | 1.931(0)        | 2.008       |
|                    | 1.945(7)        |             |                     | 1.918(7)        |             |                    | 2.059(6)        |             |
|                    | 1.945(7)        |             |                     | 2.057(4)        |             |                    | 2.059(6)        |             |
|                    | 1.945(7)        |             |                     | 1.918(7)        |             |                    | 1.931(0)        |             |
|                    | 1.945(7)        |             |                     | 1.899(7)        |             |                    | 2.059(6)        |             |
|                    | 1.945(7)        |             |                     | 2.035(5)        |             |                    | 1.931(0)        |             |

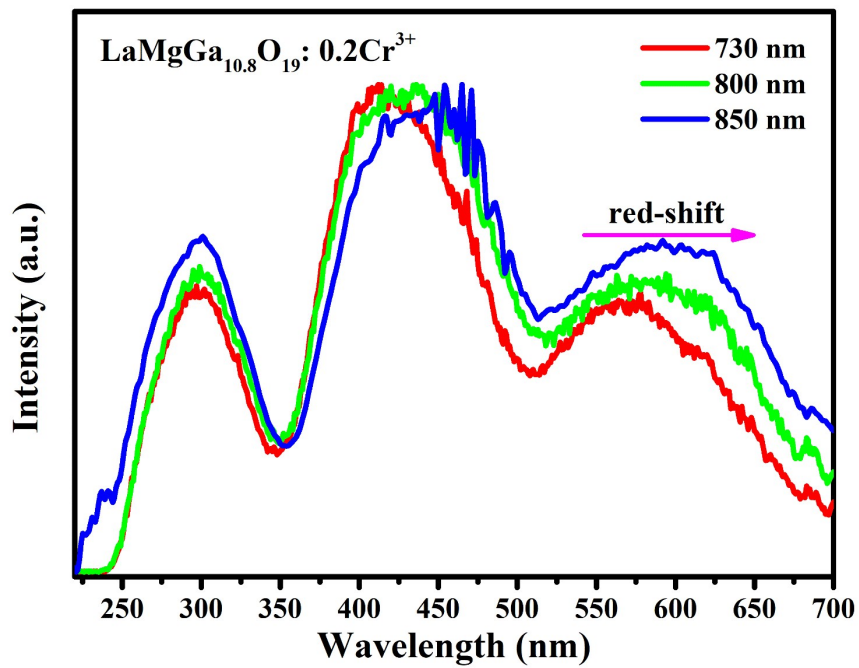

**Figure S1.** PLE spectra of  $\text{LaMgGa}_{10.8}\text{O}_{19}:0.2\text{Cr}^{3+}$  monitored at different emission wavelength (730, 800 and 850 nm).

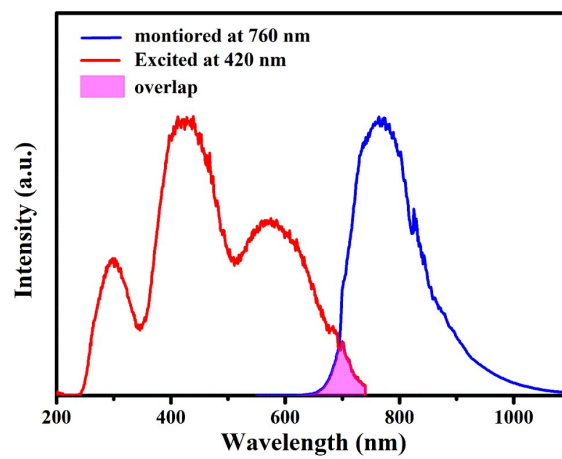

**Figure S2.** PL and PLE spectra of  $\text{LaMgGa}_{10.8}\text{O}_{19}:0.2\text{Cr}^{3+}$ .

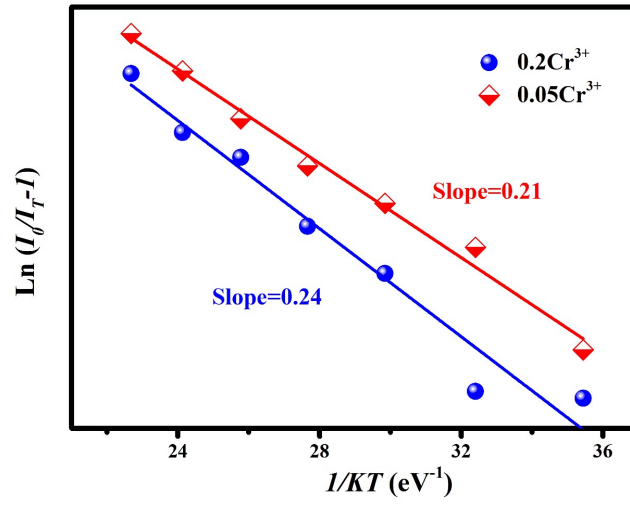

**Figure S3.**  $\ln(I_0/I_{T-1})$  vs.  $1/KT$  graph for thermal quenching of  $\text{LaMgGa}_{11-x}\text{O}_{19}:x\text{Cr}^{3+}$  ( $x=0.05, 0.2$ )
